# Supplementary material for: Pathogenic load and frailty in older adults: Singapore longitudinal ageing study
Source: publisher site journal article supplement (doi:10.18632/aging.104076), 2020-11-06
Supplement: Supplementary file [file aging-v12i21-104076-supplementary-material-SD1.pdf]

## SUPPLEMENTARY TABLES

**Supplementary Table 1. List of 87 binary variables used to derive Frailty Index.**

|    | <b>Item</b>                                                   |
|----|---------------------------------------------------------------|
| 1  | Live alone                                                    |
| 2  | No body able to help if you needed/wanted                     |
| 3  | Need help with finances                                       |
| 4  | Single divorced widowed                                       |
| 5  | Hearing problem                                               |
| 6  | Low Visual function (VF14<100)                                |
| 7  | Depression GDS >=5                                            |
| 8  | Cognitive impairment MMSE<23                                  |
| 9  | Physically prefrail or frail (CHS criteria)                   |
| 10 | Wide waist circumference                                      |
| 11 | Hypertension (Self-report, medication, high sitting BP        |
| 12 | Dyslipidaemia (self-report, abnormal lipid panel, medication) |
| 13 | Diabetes (self-report, medication, elevated FBG               |
| 14 | Orthostatic hypotension                                       |
| 15 | History of stroke                                             |
| 16 | History of myocardial infarct                                 |
| 17 | History of atrial fibrillation                                |
| 18 | History of heart failure                                      |
| 19 | History of cataracts/major eye problems                       |
| 20 | History of kidney failure on dialysis                         |
| 21 | History of asthma                                             |
| 22 | History of chronic obstructive lung disease                   |
| 23 | History of arthritis                                          |
| 24 | History of hip fracture                                       |
| 25 | History of mental illness                                     |
| 26 | History of any other problems                                 |
| 27 | History of cancer                                             |
| 28 | Hospitalized in past one year                                 |
| 29 | Fall(s) in past 6 months                                      |
| 30 | Treated for Injury in past one year                           |
| 31 | Anaemia (Hb<13 in male, <12 in female)                        |
| 32 | Low Albumin <40mg/dL                                          |
| 33 | Chronic kidney disease (eGFR<60 ml/min                        |
| 34 | Low BMI (<18.5)                                               |
| 35 | Overweight/Obese (BMI >27.5k/m2)                              |
| 36 | Illness changes the kind/amount of food eaten                 |
| 37 | Fewer than 2 meals eaten per day                              |
| 38 | Few fruits/vegetables/milk products eaten (less than 1/day)   |
| 39 | 3 or more drinks of alcohol daily                             |
| 40 | Eating difficulty due to tooth or oral problems               |
| 41 | Not enough money to buy needed food                           |
| 42 | Eat alone most of the time                                    |
| 43 | 5 or more different prescribed/over the counter drugs a day   |
| 44 | Unintended weight loss 10lbs/4kg last 6 months                |

45 Unintended weight gain 10lbs/4kg last 6 months  
46 Not physically able to shop, cook and/or feed myself  
47 Eat few milk products (less than once a day)  
48 Chronic airway obstruction (FEV1/FVC <0.70)  
49 Cough on getting up in the morning  
50 Cough during the day or night  
51 Cough over 3 months in the year  
52 Phlegm on getting up in the morning  
53 Phlegm during the day or night  
54 Phlegm over 3 months in the year  
55 Cough with phlegm for 3 consecutive months in past year  
56 Increased cough/phlegm for 3 weeks or more in past 3 years  
57 Breathless on mild exertion  
58 Need help with bathing  
59 Need help with dressing  
60 Need help transfer from bed to chair and back  
61 Need help walking around the house  
62 Need help eating  
63 Need help with grooming  
64 Need help with using toilet  
65 Need help getting up and down stairs  
66 Need help with shopping  
67 Need help with housework  
68 Need help using phone  
69 Need help with meal preparations  
70 Need help with taking medication  
71 Feel everything I do is an effort  
72 Poor general health  
73 Limited in doing moderate activities during typical day  
74 Limited in climbing stairs during typical day  
75 Limited in accomplishing lesser than would like  
76 Limited in work/other activities  
77 Emotional problems - accomplished lesser  
78 Emotional problems interfere with work or other activities  
79 Pain interfere with normal work  
80 Felt calm & peaceful none of the time  
81 Have lots of energy none of the time  
82 Felt downhearted and low past 4 wks  
83 Physical/emotional problems interfere with social activities  
84 Life is fairly or very boring  
85 Life is fairly or very sad  
86 Life is fairly or very hard  
87 Feel lonely

---

**Supplementary Table 2. Serological tests.**

| <b>ELISA kit</b>            | <b>Company</b>        | <b>Units</b> | <b>Range</b>   | <b>Negative</b>                        | <b>Grey zone</b>                     | <b>Positive</b>                                                          |
|-----------------------------|-----------------------|--------------|----------------|----------------------------------------|--------------------------------------|--------------------------------------------------------------------------|
| Cytomegalovirus             | Genesis Diagnostics   | IU/ml        | 0-30 IU/ml     | OD < 3 IU/ml standard OD               | NA                                   | OD >= 3 IU/ml standard OD                                                |
| Dengue                      | Diagnostic Automation | NA           | NA             | 0 - 0.15 OD units                      | NA                                   | Weakly positive: 0.16 - 1.0 OD units<br>Strongly positive: >1.0 OD units |
| Herpes simplex 1            | Novatec               | NTU          | NA             | OD is lower than 10% below the cut-off | OD of 10% above or below the cut-off | OD is higher than 10% over the cut-off                                   |
| Herpes simplex 2            | Novatec               | NTU          | NA             |                                        |                                      |                                                                          |
| Varicella-zoster virus      | Novatec               | NTU          | NA             |                                        |                                      |                                                                          |
| Epstein-Barr virus (VCA)    | Novatec               | NTU          | NA             |                                        |                                      |                                                                          |
| Respiratory syncytial virus | Novatec               | NTU          | NA             |                                        |                                      |                                                                          |
| Chikungunya                 | Novatec               | NTU          | NA             |                                        |                                      |                                                                          |
| Mycoplasma pneumonia        | Novatec               | NTU          | NA             |                                        |                                      |                                                                          |
| H. Pylori                   | Novatec               | NTU          | 0 - 150 NTU/ml | < 15 NTU/ml                            | 15 - 20 NTU/ml                       | > 20 NTU/ml                                                              |

\*NTU = Novatec Units
